# Supplementary material for: A stable anionic metal–organic framework with open coordinated sites: selective separation toward cationic dyes and sensing properties
Source: Royal Society of Chemistry journal article supplement (doi:10.1039/c8ce02060d), 2019-01-01
Supplement: c8ce02060d1.pdf [file c8ce02060d1.pdf]

## Supporting Information

### A stable anionic metal-organic framework with open coordinated sites: selective separation toward cationic dyes and sensing properties

Wei Gao<sup>ab</sup>, Feng Liu<sup>b</sup>, Chang-Wei Pan<sup>a</sup>, Xiu-Mei Zhang<sup>\*bc</sup>, Jie-Ping Liu<sup>b</sup> and Qing-Yu Gao<sup>\*a</sup>

**Table S1** Crystal data and structure refinement for Cd-MOF-1

|                                                  | Cd-MOF-1                                                                       |
|--------------------------------------------------|--------------------------------------------------------------------------------|
| Empirical formula                                | C <sub>48</sub> H <sub>38</sub> Cd <sub>3</sub> N <sub>6</sub> O <sub>17</sub> |
| Formula weight                                   | 1308.07                                                                        |
| Crystal system                                   | Monoclinic                                                                     |
| Space group                                      | <i>P2<sub>1</sub>/c</i>                                                        |
| <i>a</i> / Å                                     | 17.960(4)                                                                      |
| <i>b</i> / Å                                     | 12.903(2)                                                                      |
| <i>c</i> / Å                                     | 24.414(4)                                                                      |
| $\alpha$ / °                                     | 90                                                                             |
| $\beta$ / °                                      | 127.047(11)                                                                    |
| $\gamma$ / °                                     | 90                                                                             |
| <i>V</i> / Å <sup>3</sup>                        | 4515.6(14)                                                                     |
| <i>Z</i>                                         | 4                                                                              |
| <i>D<sub>c</sub></i> (g m <sup>-3</sup> )        | 1.924                                                                          |
| $\mu$ (mm <sup>-1</sup> )                        | 1.487                                                                          |
| <i>F</i> (000)                                   | 2592                                                                           |
| Reflections collected                            | 24028                                                                          |
| Unique reflections                               | 7740                                                                           |
| GOF on <i>F</i> <sup>2</sup>                     | 1.012                                                                          |
| <i>R</i> <sub>int</sub>                          | 0.0780                                                                         |
| <i>R</i> 1 [ <i>I</i> > 2 $\sigma$ ( <i>I</i> )] | 0.0453                                                                         |
| <i>wR</i> 2 (all data)                           | 0.1056                                                                         |

**Table S2** Selected bond lengths (Å) and angles (°) for Cd-MOF-1.

| Cd-MOF-1 |          |        |          |
|----------|----------|--------|----------|
| Cd1-O1   | 2.342(4) | Cd1-O2 | 2.369(4) |
| Cd1-O4A  | 2.263(4) | Cd1-O7 | 2.441(5) |

|              |            |              |            |
|--------------|------------|--------------|------------|
| Cd1-O8       | 2.323(4)   | Cd1-O14      | 2.194(4)   |
| Cd2-O14      | 2.229(4)   | Cd2-O10B     | 2.270(5)   |
| Cd2-O5C      | 2.305(5)   | Cd2-O15      | 2.333(5)   |
| Cd2-N4D      | 2.351(5)   | Cd2-O3A      | 2.405(5)   |
| Cd3-O14      | 2.227(4)   | Cd3-O9B      | 2.278(5)   |
| Cd3-O12E     | 2.290(5)   | Cd3-O13      | 2.322(5)   |
| Cd3-O6C      | 2.335(5)   | Cd3-N3       | 2.344(5)   |
| O14-Cd1-O4A  | 93.01(16)  | O14-Cd1-O8   | 104.22(16) |
| O4A-Cd1-O8   | 91.39(17)  | O14-Cd1-O1   | 102.38(16) |
| O4A-Cd1-O1   | 119.47(17) | O8-Cd1-O1    | 137.66(17) |
| O14-Cd1-O2   | 153.21(15) | O4A-Cd1-O2   | 86.61(17)  |
| O8-Cd1-O2    | 102.58(16) | O1-Cd1-O2    | 55.79(16)  |
| O14-Cd1-O7   | 99.80(17)  | O4A-Cd1-O7   | 146.10(17) |
| O8-Cd1-O7    | 55.11(17)  | O1-Cd1-O7    | 88.35(16)  |
| O2-Cd1-O7    | 95.19(18)  | O14-Cd2-O10B | 108.10(16) |
| O14-Cd2-O5C  | 91.49(16)  | O10B-Cd2-O5C | 91.49(16)  |
| O14-Cd2-O15  | 83.39(16)  | O10B-Cd2-O15 | 166.85(17) |
| O5C-Cd2-O15  | 95.96(17)  | O14-Cd2-N4D  | 168.19(17) |
| O10B-Cd2-N4D | 83.24(18)  | O5C-Cd2-N4D  | 91.76(18)  |
| O15-Cd2-N4D  | 84.98(18)  | O14-Cd2-O3A  | 81.23(15)  |
| O10B-Cd2-O3A | 86.87(17)  | O5C-Cd2-O3A  | 170.91(16) |
| O15-Cd2-O3A  | 88.65(16)  | N4D-Cd2-O3A  | 96.46(18)  |
| O14-Cd3-O9B  | 92.65(17)  | O14-Cd3-O12E | 86.89(16)  |
| O9B-Cd3-O12E | 170.98(17) | O14-Cd3-O13  | 90.46(16)  |
| O9B-Cd3-O13  | 84.94(19)  | O12E-Cd3-O13 | 104.07(19) |
| O14-Cd3-O6C  | 99.42(16)  | O9B-Cd3-O6C  | 99.42(16)  |
| O12E-Cd3-O6C | 85.36(18)  | O13-Cd3-O6C  | 166.77(18) |
| O14-Cd3-N3   | 169.03(18) | O9B-Cd3-N3   | 96.6(2)    |
| O12E-Cd3-N3  | 84.85(19)  | O13-Cd3-N3   | 84.57(19)  |

O6C-Cd3-N3 87.11(18)

Symmetry codes: A  $-x+1, y+1/2, -z+3/2$ ; B  $-x+2, -y+1, -z+2$ ; C  $-x+1, -y+1, -z+1$ ; D  $x-1, -y+3/2, z-1/2$ ; E  $-x+2, y+1/2, -z+3/2$ .

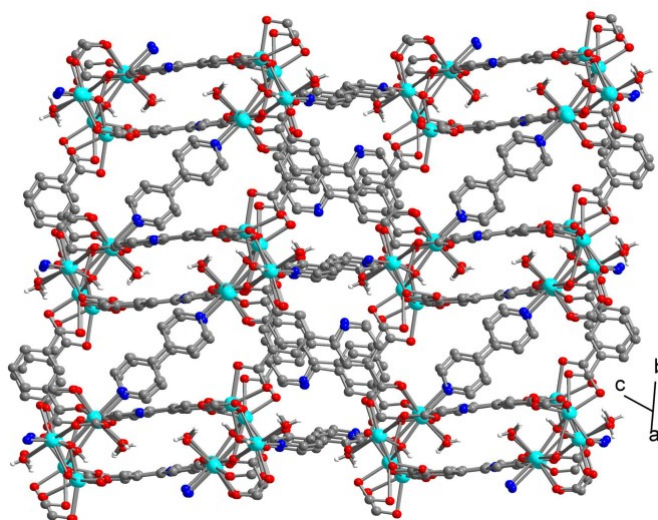

**Fig. S1** 3D framework with accessible Lewis-base sites of Cd-MOF-1.

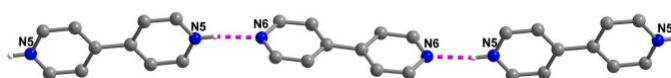

**Fig. S2** The hydrogen-bonded chains of Cd-MOF-1.

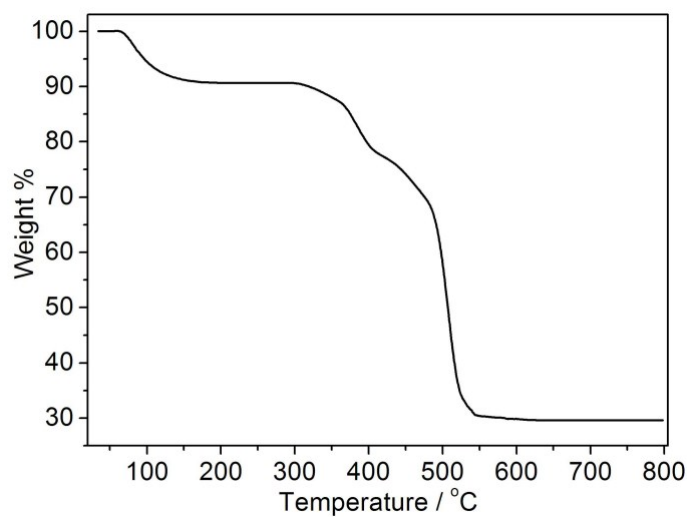

**Fig. S3** TGA curve of Cd-MOF-1.

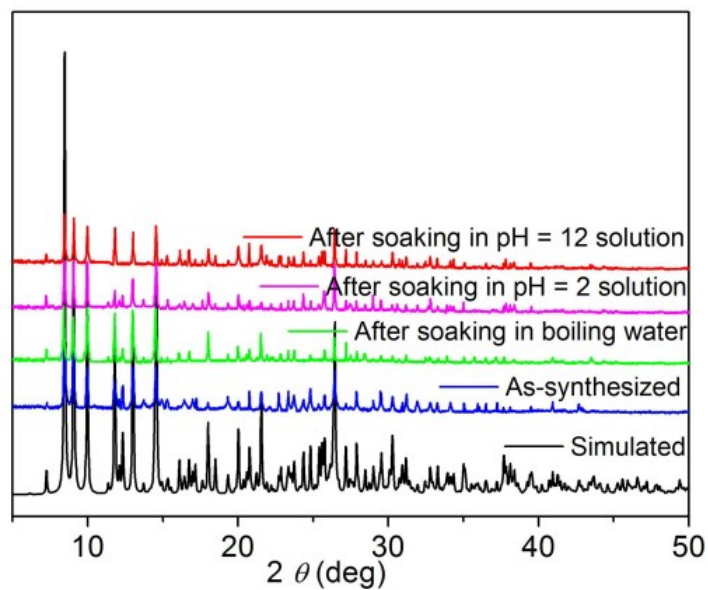

**Fig. S4** PXRd patterns of Cd-MOF-1 in different pH values in the range of 2-12 and the boiling water.

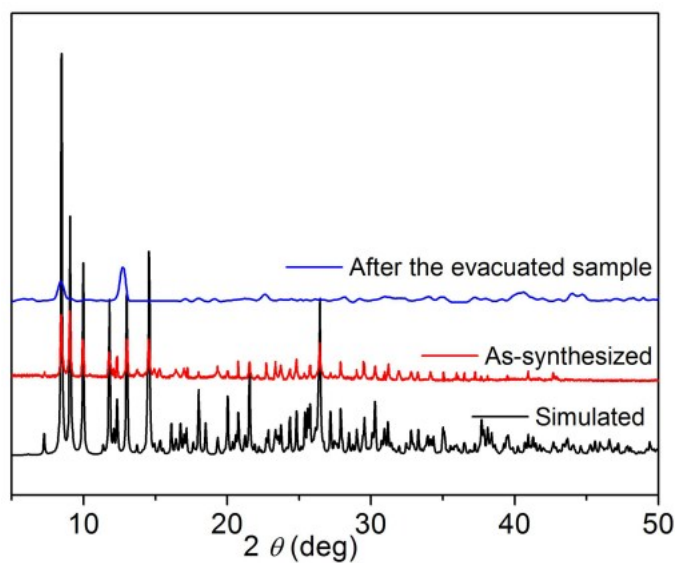

**Fig. S5** PXRd patterns of Cd-MOF-1: (black line) simulated from the single-crystal data, (red line) for the as-synthesized sample, (blue line) for the evacuated sample.

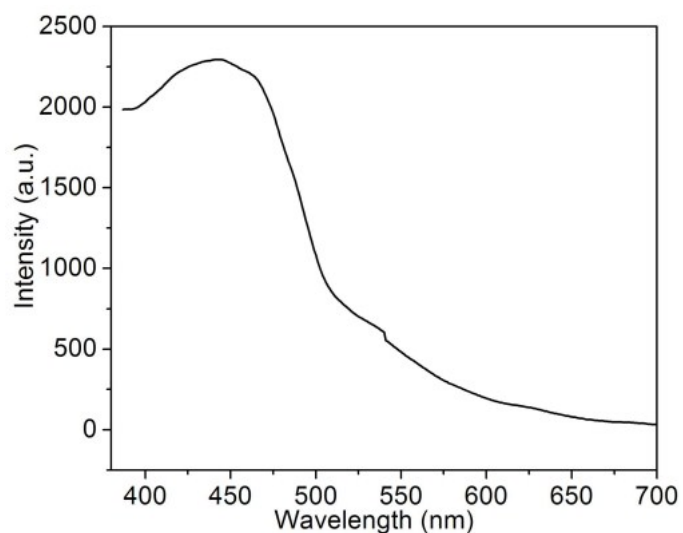

**Fig. S6** Solid state emission spectra ( $\lambda_{\text{ex}} = 357$  nm) of free H<sub>3</sub>L ligand at room temperature.

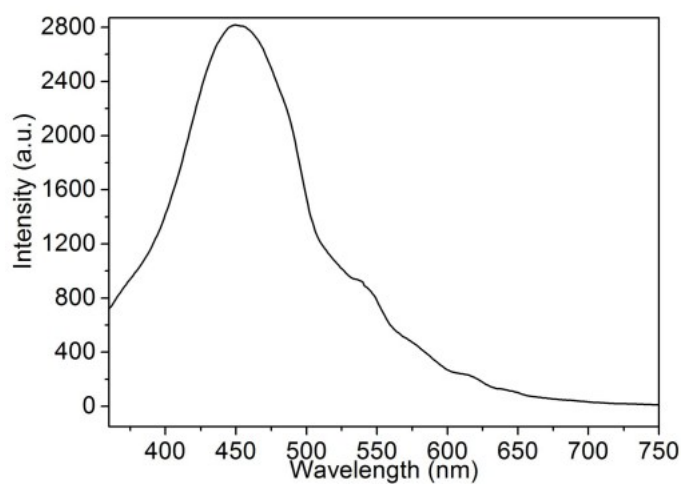

**Fig. S7** Solid state emission spectra of Cd-MOF-1.

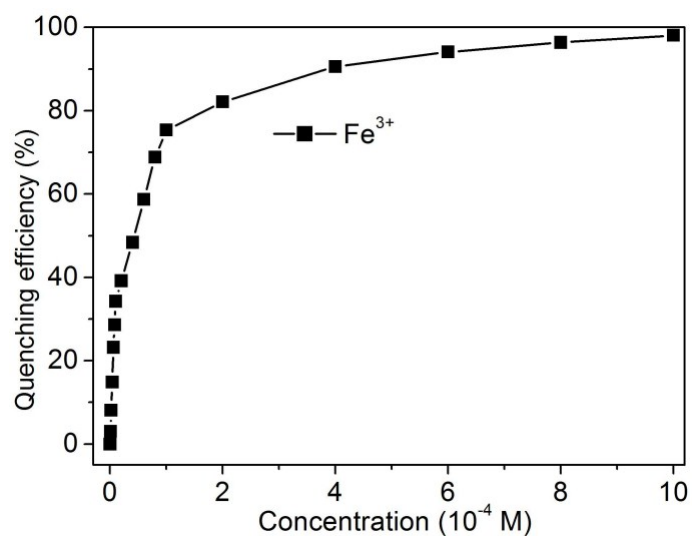

**Fig. S8** Dependence of the quenching efficiency on the concentration of Fe<sup>3+</sup> ions.

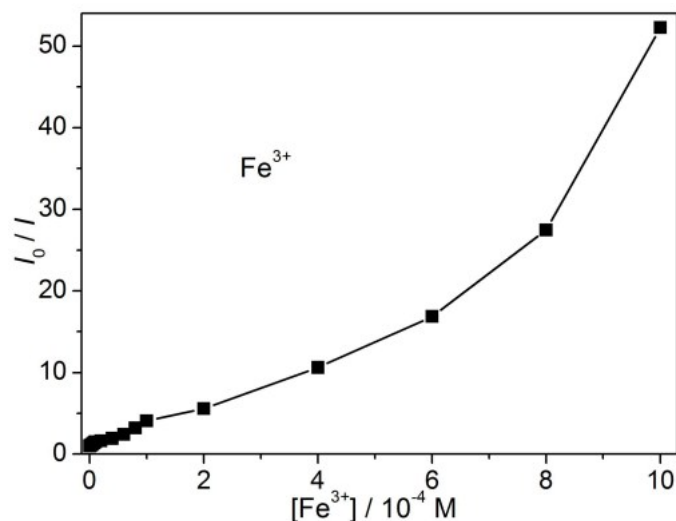

**Fig. S9** The Stern-Volmer plot of  $I_0/I$  vs  $\text{Fe}^{3+}$  concentration for Cd-MOF-1.

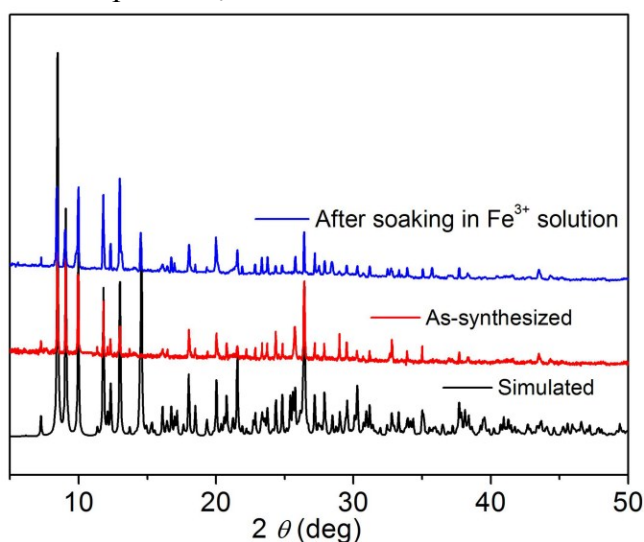

**Fig. S10** The powder X-ray diffraction patterns of simulated Cd-MOF-1, as-synthesized Cd-MOF-1 and Cd-MOF-1 immersed in 1.0 mM water solutions of  $\text{Fe}^{3+}$  ions.

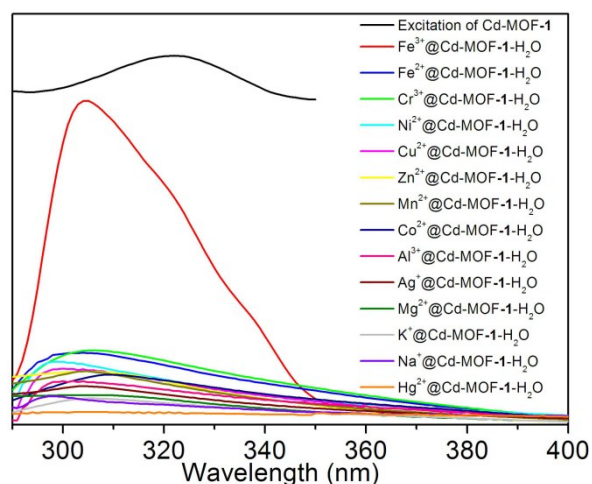

**Fig. S11** The UV-Vis absorption spectra of Cd-MOF-1 immersed in different metal ions and the excitation for Cd-MOF-1.

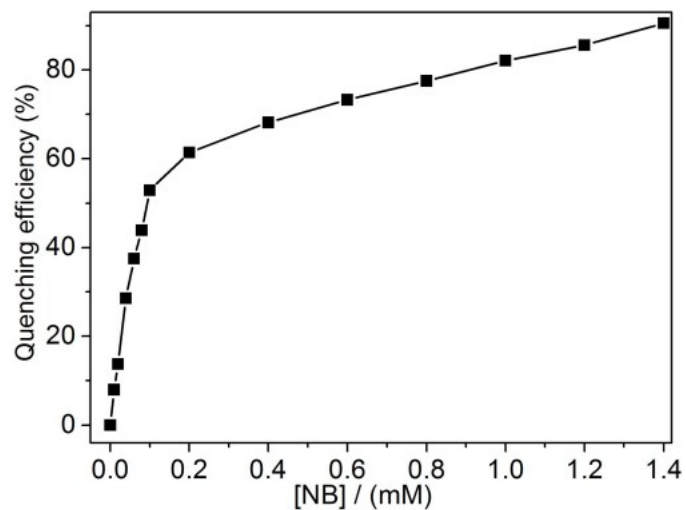

**Fig. S12** Dependence of the quenching efficiency on the concentration of NB.

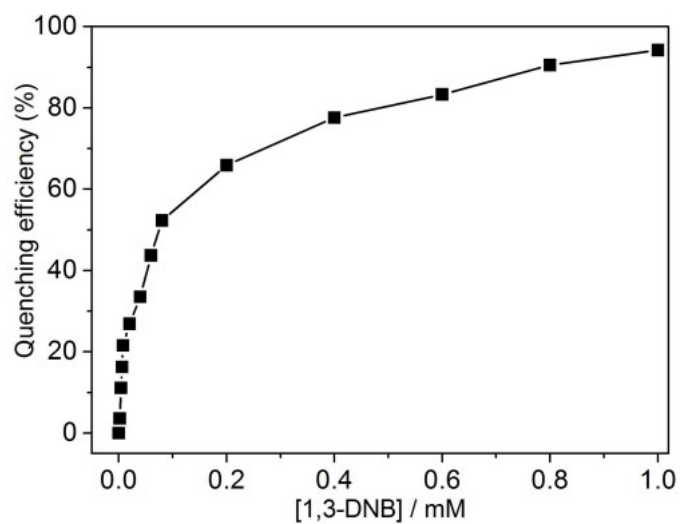

**Fig. S13** Dependence of the quenching efficiency on the concentration of 1,3-DNB.

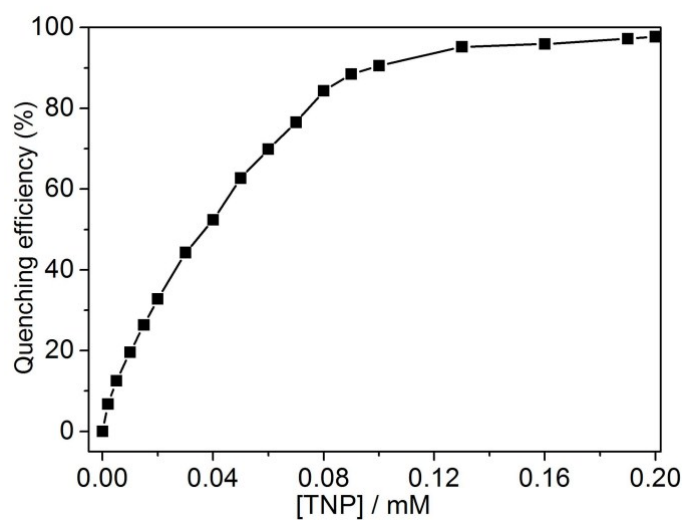

**Fig. S14** Dependence of the quenching efficiency on the concentration of TNP.

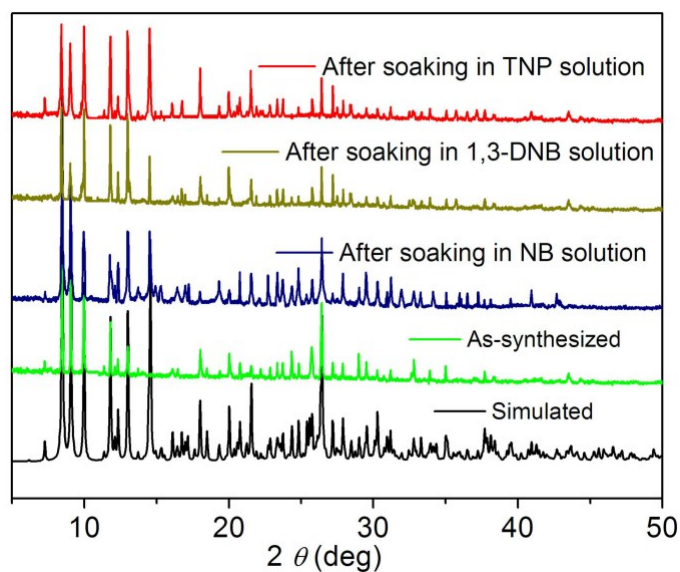

**Fig. S15** The powder X-ray diffraction patterns of simulated Cd-MOF-1, as-synthesized Cd-MOF-1 and Cd-MOF-1 immersed in 1.0 mM EtOH solutions of NB, 1,3-DNB and TNP.

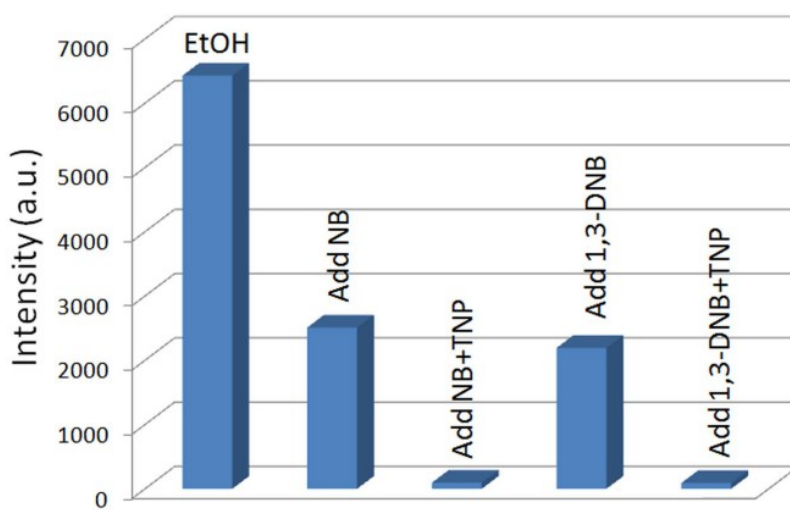

**Fig. S16** The luminescence intensity at 454 nm of Cd-MOF-1 soaking in the single and mixed NACs EtOH solutions with TNP.



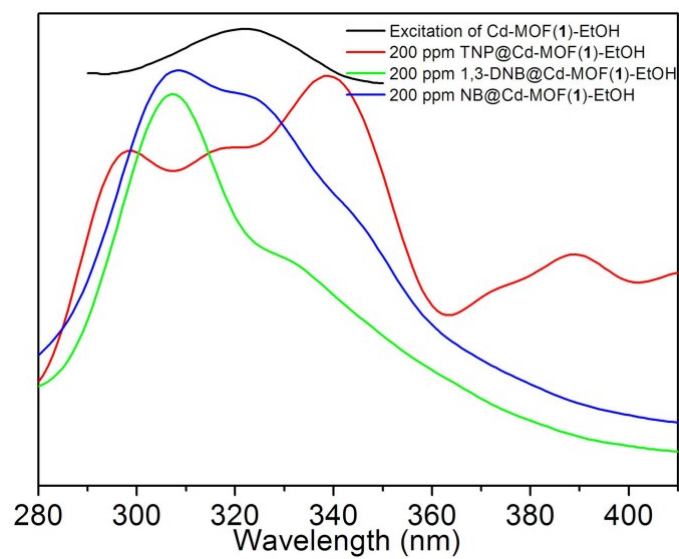

**Fig. S17** The UV-Vis absorption spectrum of EtOH solutions of different testing nitro explosives (NB, 1,3-DNB and TNP) and the excitation for Cd- MOF-1.

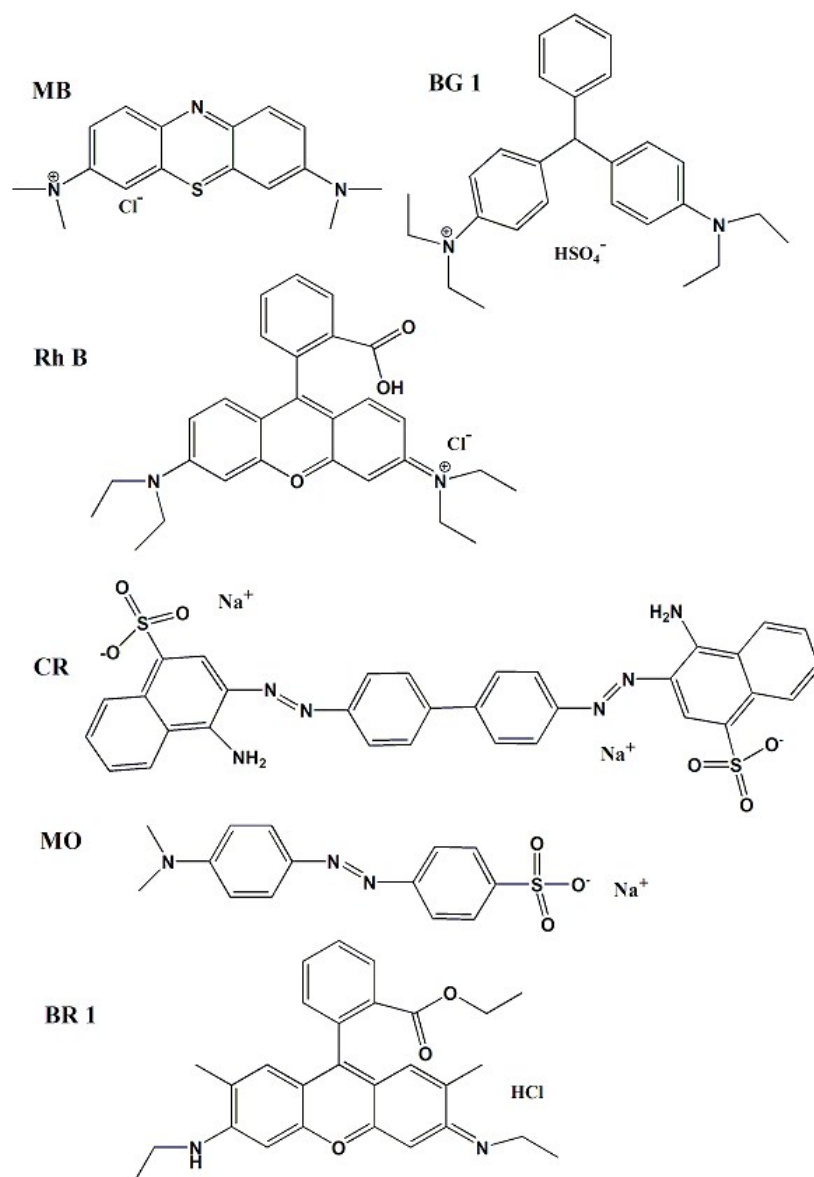

**Fig. S18** The structures of dye molecules that were used in the dye adsorption and separation experiment.

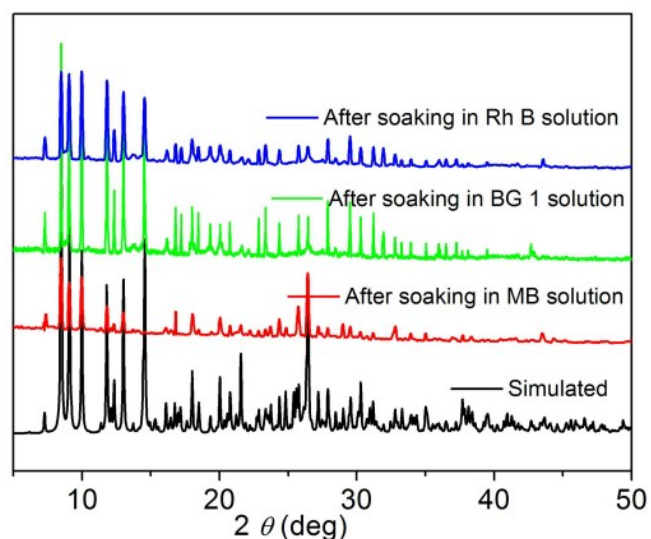

**Fig. S19** XRPD patterns of simulated Cd-MOF-1 (black), and after the absorption of MB (red), BG 1 (green) and Rh B (blue), respectively.

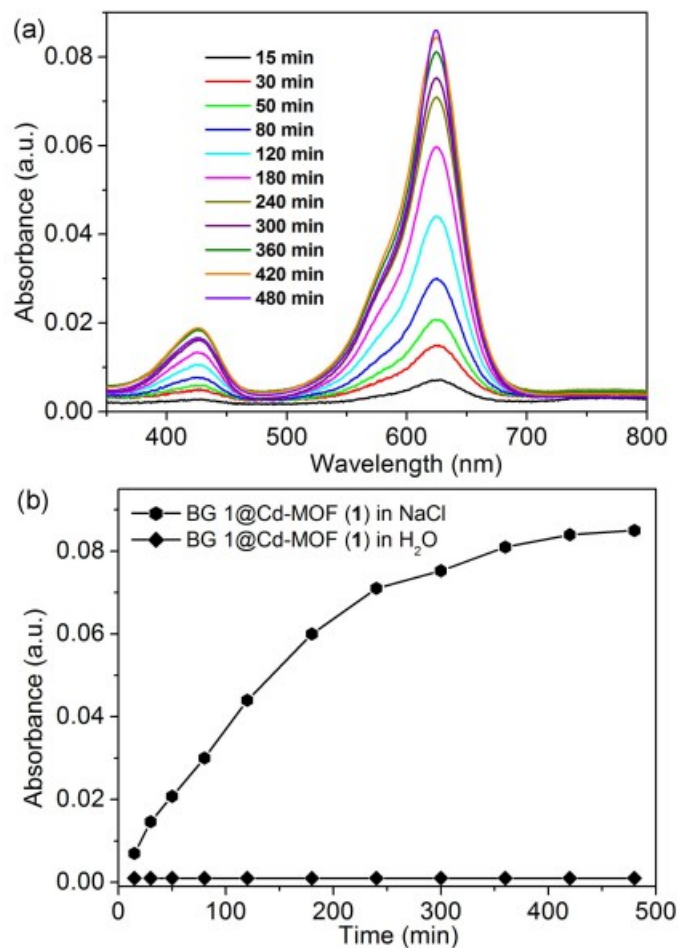

**Fig. S20** (a) UV-vis spectra of the BG1 released from BG 1@Cd-MOF-1 in a saturated NaCl aqueous solution; (b) The release-rate comparison of BG 1 from BG 1@Cd-MOF-1 in a saturated NaCl aqueous solution and deionized water.

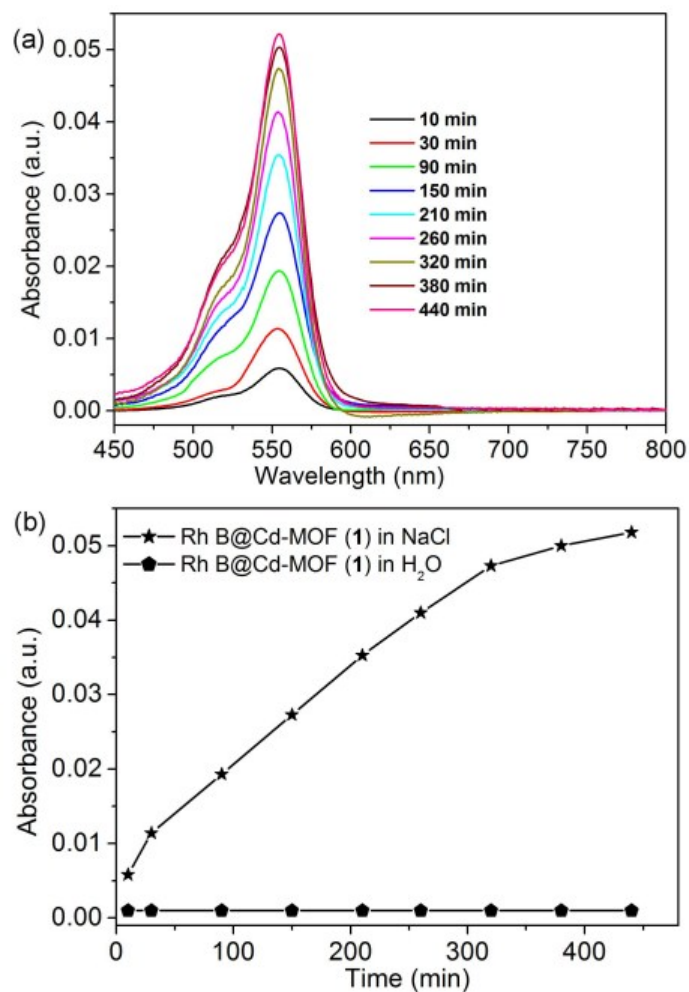

**Fig. S21** (a) UV-vis spectra of the Rh B released from Rh B@Cd-MOF-1 in a saturated NaCl aqueous solution; (b) The release-rate comparison of Rh B from Rh B@Cd-MOF-1 in a saturated NaCl aqueous solution and deionized water.
